# Supplementary material
Source: MDPI journal article supplement (https://www.mdpi.com/2227-9040/10/5/155)
Supplement: s1 [file s1]

Archive with 2 entries (2 files):
- chemosensors-1670981-supplementary.pdf
- Video S1-Demonstration of the kinetic paper-based assay for the analysis of glucose.mp4
