# Supplementary material
Source: MDPI journal article supplement (https://www.mdpi.com/2227-9040/10/5/155)
Supplement: s1 [file s1 › chemosensors-1670981-supplementary.pdf]

## **SUPPLEMENTARY INFORMATION**

### **Wax-printed fluidic controls for delaying and accelerating fluid transport on paper-based analytical devices**

Maria Tarara<sup>1</sup>, Dimosthenis L. Giokas<sup>2</sup>, George Z. Tsogas<sup>1,\*</sup>

<sup>1</sup>Laboratory of Analytical Chemistry, School of Chemistry, Faculty of Sciences, Aristotle University of  
Thessaloniki, 54124 Thessaloniki, Greece

<sup>2</sup>Laboratory of Analytical Chemistry, Department of Chemistry, University of Ioannina, 45110 Ioannina, Greece

\* Correspondence. G.Z. Tsogas (gtsogkas@chem.auth.gr)

**Video S1:** Demonstration of the kinetic paper-based assay for the analysis of glucose.

**Table S1.** Fluid transport time and reaction time on paper devices used for the glucose assay.

| Fluidic control                     | Fluid transport time<br>(sec) | Reaction time on<br>detection zone (sec) | Total analysis time<br>(sec) |
|-------------------------------------|-------------------------------|------------------------------------------|------------------------------|
| Engraved horizontal channel         | 25±2                          | 113±8                                    | 138±5                        |
| 2 overlaying layers                 | 43±4                          | 95±6                                     | 138±4                        |
| Regular channel                     | 63±6                          | 75±4                                     | 138±5                        |
| 1 start barrier<br>(0.035 mm width) | 98±7                          | 40±3                                     | 138±5                        |

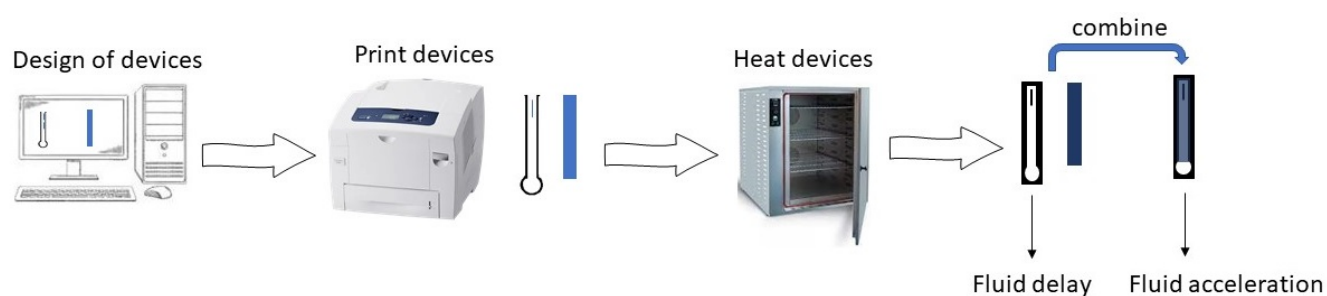

**Figure S1.** Schematic illustration of the procedure for preparing the devices.

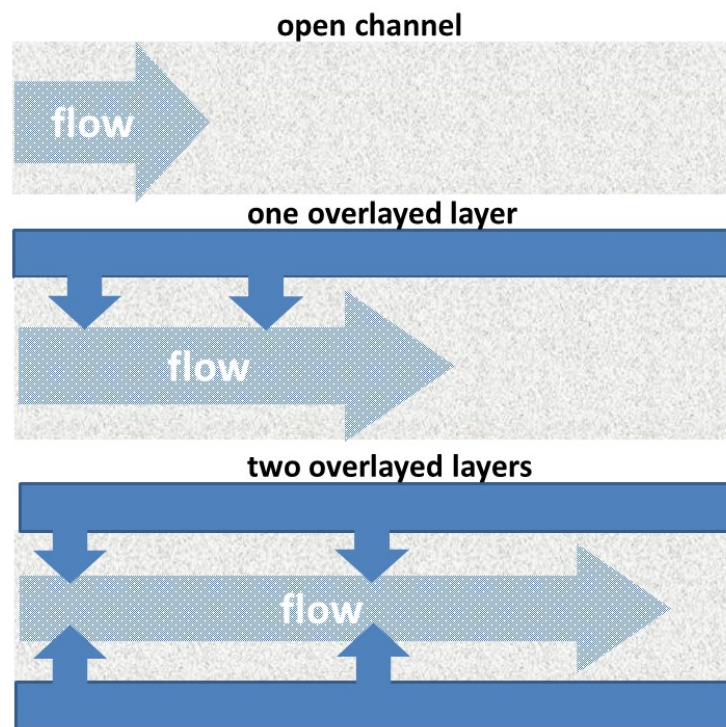

**Figure S2.** Conceptual diagram of hydrophobic forces on water that is responsible for increasing fluid rate on paper.

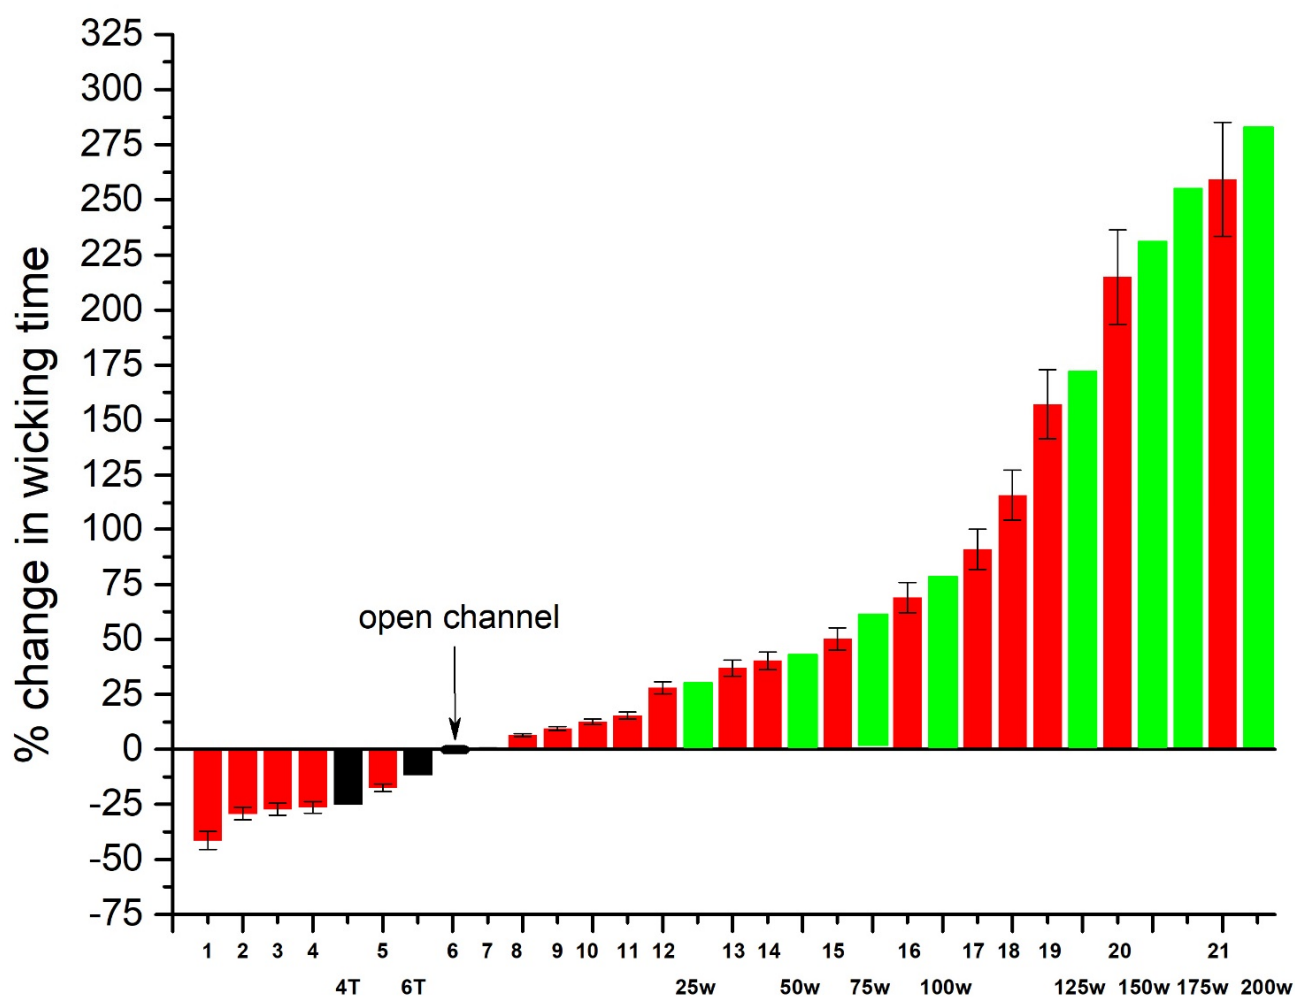

**Figure S3.** Change (% compared to open channels) in wicking times obtained by fluidic delays and accelerators (and combinations of them) as compared to fluid delays and accelerators prepared by other methods. The % change is calculated as the wicking time required for the fluid to travel a distance of 1 mm compared to the wicking time required for the fluid to travel a distance of 1 mm obtained in open channels. **1:** two overlaying layers, **2:** two overlaying layers with one end barrier of 0.035 mm width, **3:** two overlaying layers with one end barrier of 0.088 mm width, **4:** two overlaying layers with one end barrier of 0.175 mm width, **4T:** fully covered channel with 4 layers of toner, **5:** one overlaying layer, **6T:** fully covered channel with 6 layers of toner, **6:** regular (open) channel, **7:** two overlaying layers with two end barriers of 0.035 mm

width, **8**: one end barrier of 0.035 mm width, **9**: two overlaying layers with two end barriers of 0.088 mm width, **10**: two overlaying layers with two end barriers of 0.175 mm width, **11**: two end barriers of 0.035 mm width, **12**: one end barrier of 0.088 mm width, **25w**: channels with 25% wax covered (not melted), **13**: one end barrier of 0.175 mm width, **14**: one start barrier of 0.035 mm width, **50w**: channels with 50% wax covered (not melted), **15**: two end barriers of 0.088 mm width, **75w**: channels with 75% wax covered (not melted), **16**: two end barriers of 0.175 mm width, **100w**: channels with 100% wax covered (not melted), **17**: two start barriers of 0.035 mm width, **18**: one start barrier of 0.088 mm width, **19**: two start barriers of 0.088 mm width, **125w**: channels with 125% wax covered (not melted), **20**: one end barrier of 0.088 mm width, **150w**: channels with 150% wax covered (not melted), **175w**: channels with 175% wax covered (not melted), **21**: two start barriers of 0.175 mm width, **200w**: channels with 200% wax covered (not melted).

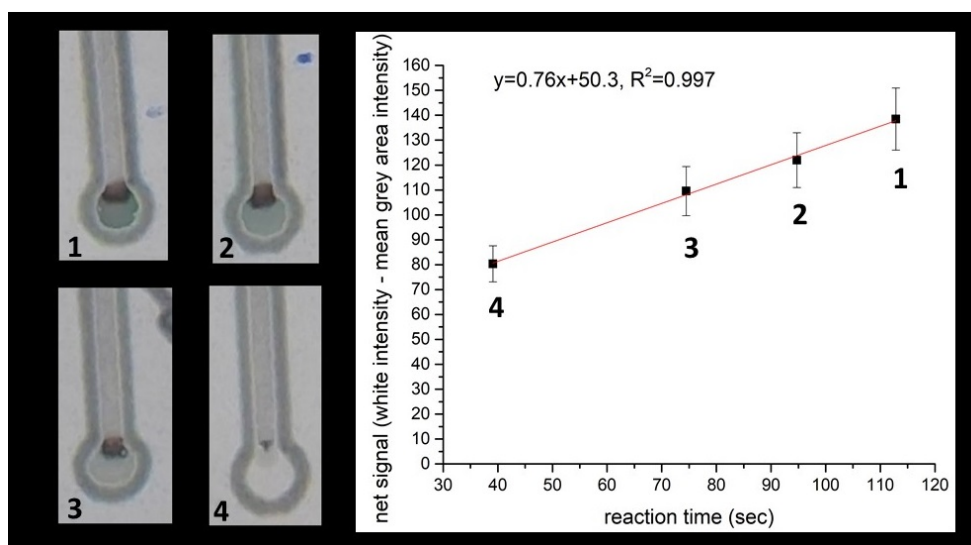

**Figure S4.** Kinetic determination of glucose on paper-based devices using programmable fluid delivery time.
